# Supplementary material for: Ultrasound imaging tracking of mesenchymal stem cells intracellularly labeled with biosynthetic gas vesicles for treatment of rheumatoid arthritis
Source: Theranostics. 2022 Feb 21;12(5):2370–82. doi: 10.7150/thno.66905 (PMC8899585; doi:10.7150/thno.66905)
Supplement: Supplementary file 1 — Supplementary figures. [file thnov12p2370s1.pdf]

## Supplementary data

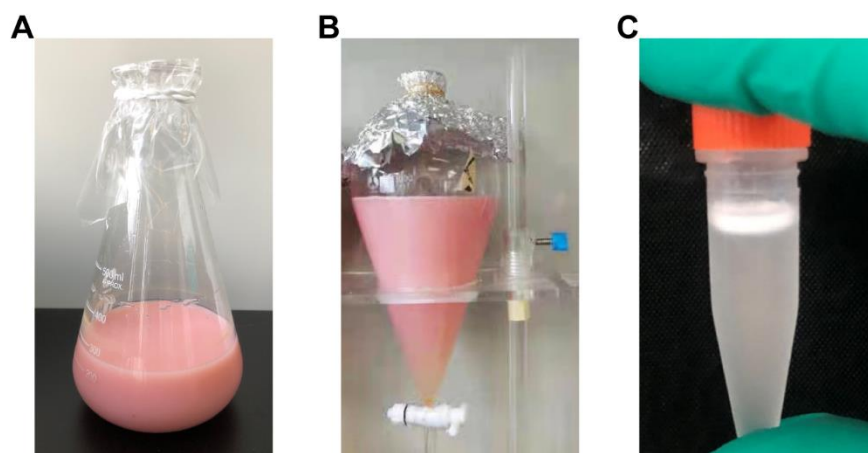

**Figure S1.** Isolation and purification process of GVs. (A) Pink archaeon *Halobacterium NRC-1* (Halo) before harvest. (B) Separation of buoyant bacterial cells in a separatory funnel. (C) The GVs were isolated from bacteria and floated on the top of the media.

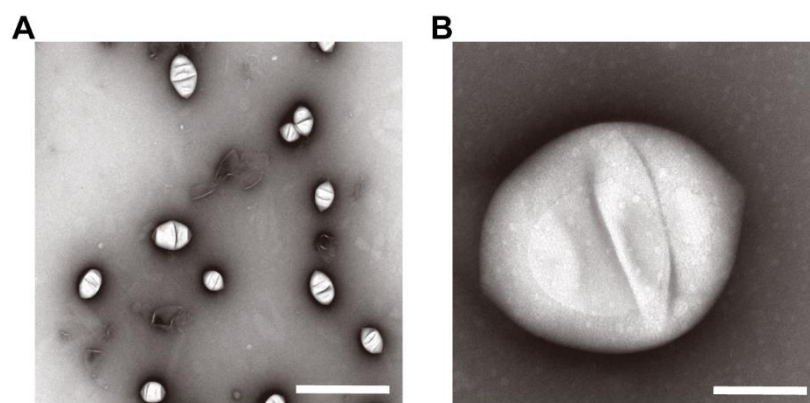

**Figure S2.** TEM image of GVs. (A) Scale bar = 1μm (B) Scale bar = 200 nm.

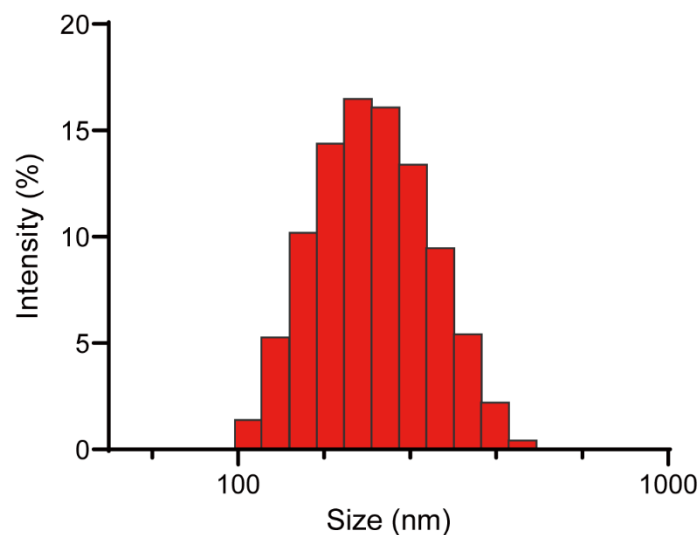

**Figure S3.** Size distribution of GVs by dynamic light scattering.

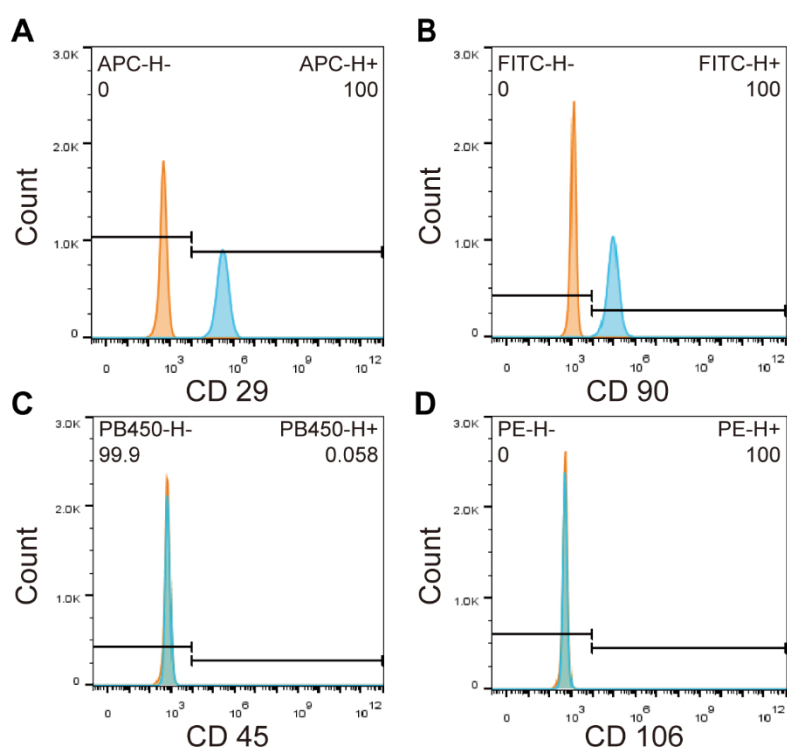

**Figure S4.** Flow cytometric analysis of harvested MSCs. The MSC populations revealed positive expression of CD29, CD90, and negative expression of CD45, CD106.

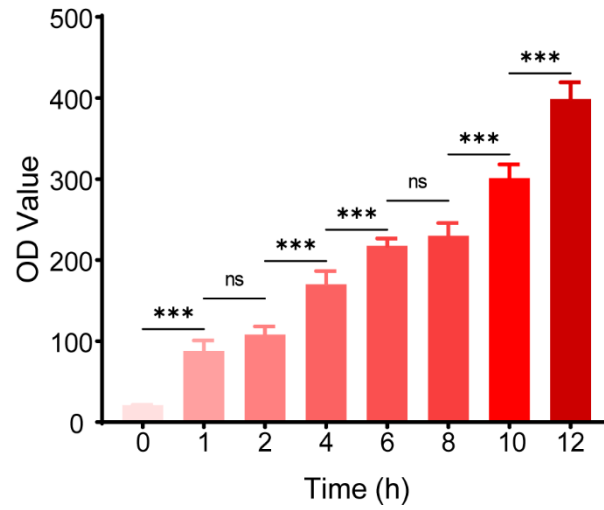

**Figure S5.** Quantitative analysis of GV@MSCs after being incubated for different time.

\*\*\*,  $p < 0.001$

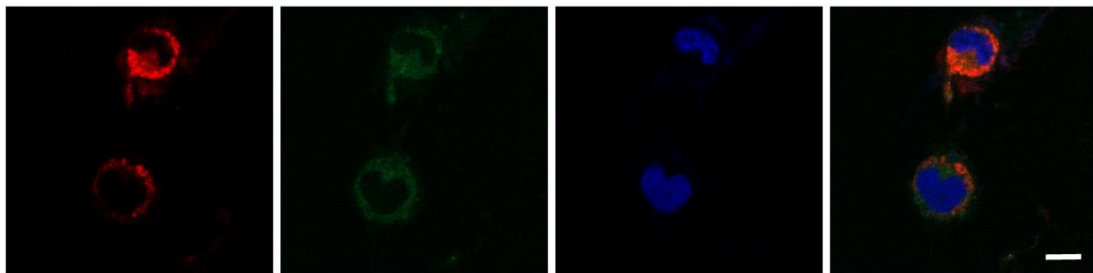

**Figure S6.** Confocal images showed GV@MSCs are located in endosome. The nuclei are stained with Hoechst 33342 (blue) and the endosomes with LysoSensor Green DND-189 (green). Scale bar = 3  $\mu\text{m}$ .

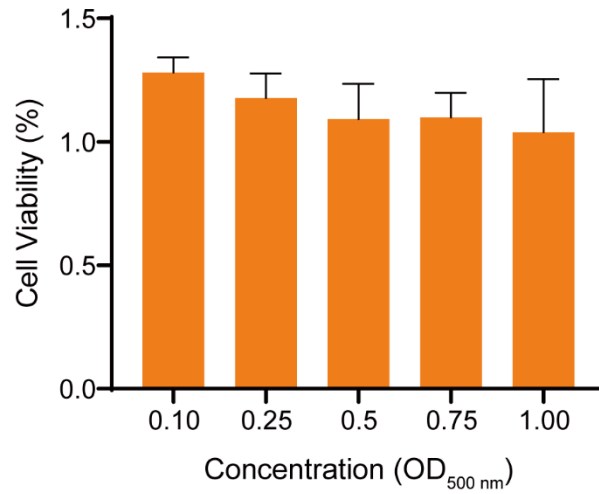

**Figure S7.** Percentages of viable MSCs after being incubated with GV at different concentrations. (OD<sub>500</sub> = 0.1, 0.25, 0.5, 0.75 and 1.0) for 10h (5 replicates).

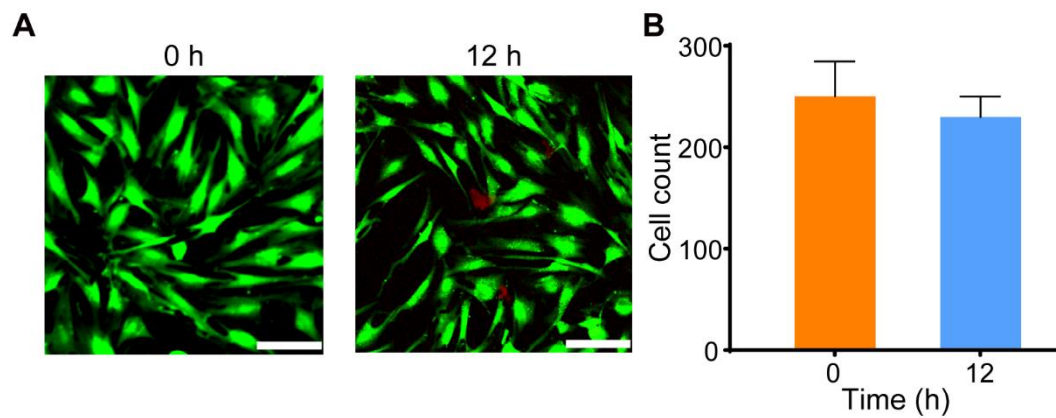

**Figure S8.** Live and dead cell double staining of MSCs after being incubated with GV for 0 or 12h. Scale bar = 100  $\mu$ m (n = 5 fields).

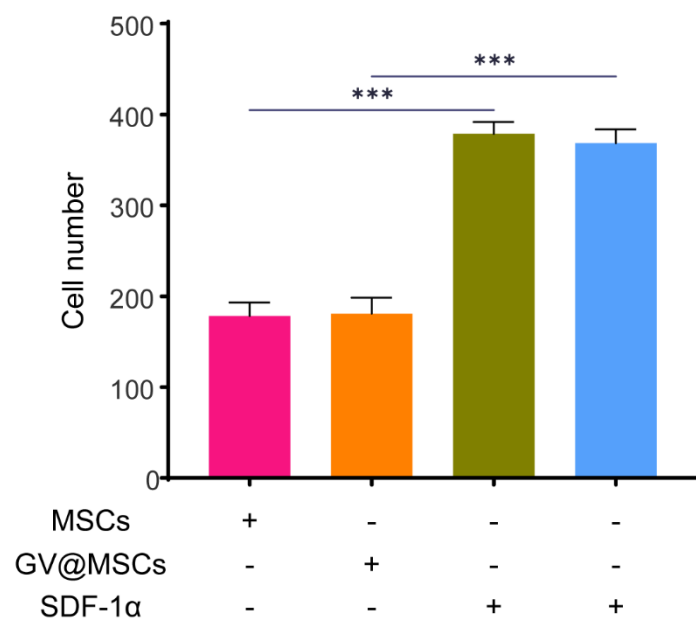

**Figure S9.** Quantitative analysis of migrating MSCs and GV@MSCs with or without SDF-1 $\alpha$ .

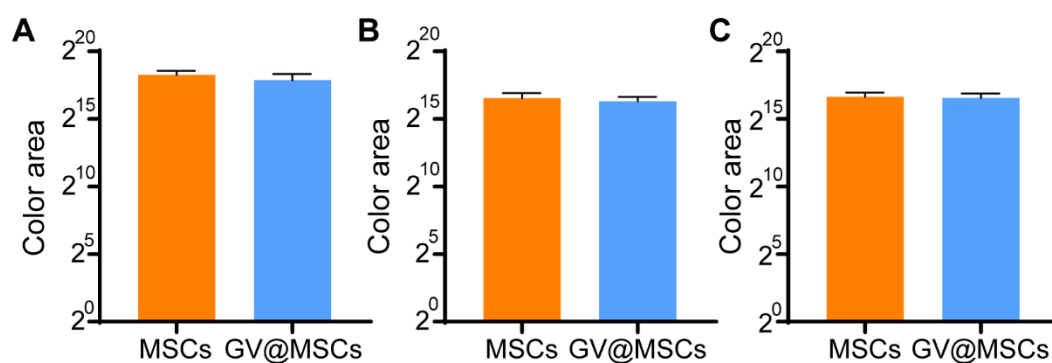

**Figure S10.** Quantitative analysis of the differentiation capability of MSCs and GV@MSCs by (A) Oil red, (B) Alizarin red and (C) Alixin blue staining.

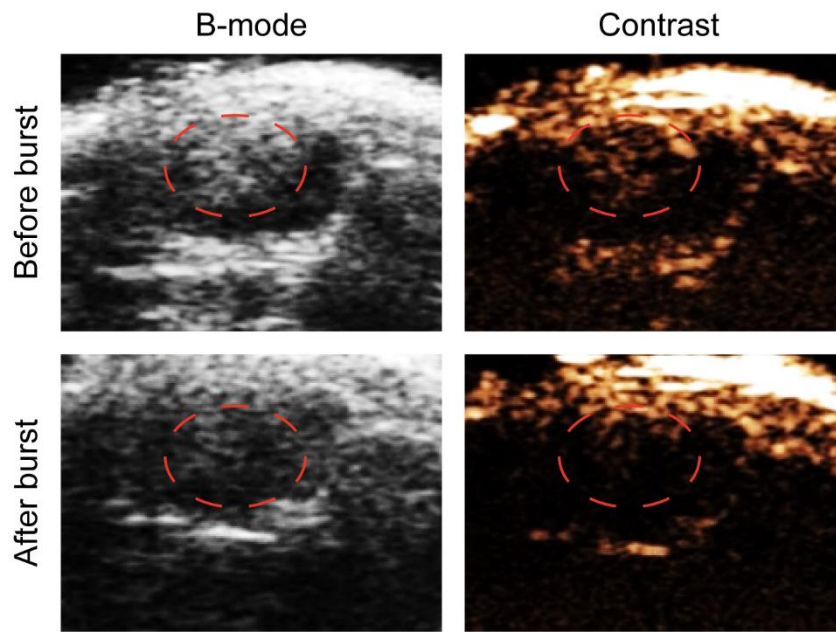

**Figure S11.** GVs can be burst by ultrasound *in vivo*. Ultrasonic images of GVs before and after destruction by a high-power ultrasound pulse when being subcutaneously injected GV@MSCs into CIA model rats' lateral malleolus joint ( $1 \times 10^7$  cells per rat).
